# Supplementary material for: Review of Absorption Oil Content in Water Injection
Source: Preprints.org preprint supplement (doi:10.20944/preprints202001.0079.v1), 2020-01-09
Supplement: Supplementary file 1 [file supplementary]

## REVIEW ADSORBSI OIL CONTENT IN WATER INJECTION

### Abstrack

Waterflood diimplementasikan dengan menginjeksikan air bertekanan ke reservoir meningkatkan laju produksi minyak. Air produksi merupakan hasil dari pengolahan minyak dan gas bumi yang paling dominan di dunia saat ini. Sementara 65% dari air ini diinjeksikan kembali ke sumur untuk pemeliharaan tekanan, 30% dari total disuntikkan ke sumur dalam untuk pembuangan akhir dalam kasus kondisi akuifer yang tepat dan sisa air dibuang ke air permukaan. Untuk shaly sand air terproduksi biasanya membawa *coarse* dan *suspended sand* ke permukaan bersama dengan air terproduksi. Oleh karena itu, kadar sand ini perlu diturunkan untuk menghindari penyumbatan (*plugging*) di sumur injeksi sampai kadar tertentu yang ekonomis.

### 1. INTRODUCTION

Air yang terproduksi merupakan produk sampingan terbesar dari produksi lapangan minyak bumi dengan rasio air terhadap minyak dengan generasi global sekitar 4:1 [1][2][3]. Seiring waktu, produksi air dari suatu sumur akan meningkat dan akan menjadi aliran utama dalam proses produksi, maka dari itu diperlukan strategi untuk menentukan apakah air tersebut harus kita buang ke laut lepas, daerah gurun sebagai *evapotion pond*, selain itu dapat di injeksi ke formasi kembali untuk *pressure maintenance*, EOR atau proses lainnya [4][5][6]. Air ini mengandung senyawa organik dan anorganik bergantung pada letak geografis lapangan, sifat dari hidrokarbon yang dihasilkan, lapisan formasi, dan komposisi mikroorganisme reservoir [7][8][9]. Sebelum melakukan proses tersebut, penting dalam melakukan pemurnian, atau perembersihan air dari zat pengotor, termasuk minyak yang masih terkandung dalam air [10][11]. Saat ini telah banyak lapangan migas yang menggunakan air yang terproduksi sebagai air injeksi yang berfungsi sebagai pendorong minyak atau yang biasa dikenal sebagai *waterflood* [12][13]. Namun, perlunya treatment dari air injeksi sebagai peningkatan kualitas air yang akan di injeksikan dan mengurangi suspensi solid dalam air tersebut agar tidak terjadi penyumbatan pada saat penginjeksian [14][15]. Sumber air utama metode *waterflood* adalah air yang terproduksi, guna mengurangi kemungkinan skala timbunan, pertumbuhan bakteri dan pembengkakan tanah di pori-pori formasi akibat pengaruh kompatibilitasnya dengan air formasi [6][14][16][17]. Tumpahan air limbah berminyak dalam jumlah besar akan berdampak

pada polusi lingkungan dan berefek pada perkembangan dan kehidupan masyarakat [18][19][20]. Berbagai metode telah banyak digunakan untuk menghilangkan minyak dalam emulsi air, termasuk adsorpsi, filtrasi, reverse osmosis, proses biologis, flotasi udara, bioreaktor membran, koagulasi kimia, elektrokoagulasi dan elektrofotasi [21]. Selain itu ada juga yang menggunakan uji centrifuge, hidrosiklon, membran dan inhibitor korosi untuk mengurangi kadar minyak dalam air [22].

## 2. METODE

### Adsorbtion

Dari banyaknya metode konvensional seperti flokulasi, koagulasi, adsorpsi, teknik membran, dll. Metode adsorpsi menunjukkan efisiensi yang lebih besar karena proses yang sederhana, ramah lingkungan, pengeluaran operasional rendah dan pemulihan adsorben yang mudah [21] [23] [24] [25] [26].

### Gas flotation

Metode *gas floatation* adalah metode pembersihan partikel yang mengendap di fluida menggunakan gas dengan mengangkat nya ke permukaan [27] mengkonfigurasi akhir menginjeksikan air bubble dengan diameter kurang dari 100  $\mu\text{m}$  ke dalam flotation tank melalui needle valve atau nozzle. Empat jenis polimer digunakan dengan variasi berat molekul dan densitas. Polimer berat yaitu hydracool 882 dan 864, semetara polimer ringan yang digunakan hydracool 852 dan 1142. Bahan telah disimpan pada suhu 5 celcius selama satu minggu. aluminium sulphate di gunakan untuk menguji koagulan dari sampel [28]. Metode *gas floatation* dapat di kembangkan lagi, salah satunya dengan menambahkan batu bara sebagai media penyerap minyak yang ada di dalam air [29][6][30][4]. Dengan penambahan batu bara sebagai *absordant* terdapat tiga proses utama yang terjadi, pertama proses difusi molekul minyak menjadi substrat dilanjutkan dengan adanya gaya kapiler sehingga memisah minyak hingga terserap ke batu bara [30]. Dengan penambahan batu bara dari berbagai jenis sebagai absordent minyak kedalam proses DAF. Parameter yang di uji adalah jenis coal, waktu penyerapan, dan ukuran coal. Akan terjadi 3 fenomena dalam proses pada eksperimen ini, difusi, capillary action dan pengaruh pH terhadap konsentrasi yang terabsorpsi.

Efisiensi polietilenimin sebagai flokulan dalam menghilangkan minyak yang ada dalam air yang diproduksi. Membandingkan efisiensi Removal polietilenimin massa molar tinggi (PEI HW) dan polietilenimin massa molar rendah (PEI LW) bersama dengan surfaktan SDB anionic. Semakin tinggi konsentrasi SDBS dalam medium, semakin besar efisiensi removal polietilenimin. Dalam sistem DAF, PEI HW menunjukkan hasil yang lebih baik daripada PEI LW dan efisiensi removal yang tinggi mulai dari konsentrasi antara 100 ppm SDBS [31].

### **Cyclones Separation**

Pelaksanaan EOR penginjeksian air bersama polimer akan lebih sulit diolah ketimbang waterflood. Ketika peningkatan kualitas air waterflood membutuhkan waktu 6 jam, maka polymer flood membutuhkan waktu 12 jam. Untuk itu perlu teknologi yang terbaru dalam peningkatan kualitas air polymerflood. Metode Double Cone Air Sparged Hydroclone (DcASH) merupakan jawaban dalam peningkatan kualitas air pada polymerflood [32][33].

### **Membrane**

Teknologi membrane (MBR) telah menjadi komponen utama dalam reklamasi air skema karena kemungkinan menyediakan air berkualitas tinggi [34][35]. Selain itu, teknik ini hemat biaya untuk mendapatkan limbah yang diolah. Microfiltration (MF) hanya mampu menghapus bahan yang ditanggihkan, umumnya berukuran sekitar 0,05  $\mu\text{m}$ , dengan demikian, MF mampu menolak material. UF (Ultra Filtration) [36][37] bisa menghilangkan koloid dan larut molekul makro, umumnya mampu menolak material berukuran 0,005-0,5  $\mu\text{m}$  dan NF (Nano Filtration) 0,0007-0,005  $\mu\text{m}$  partikel. Sedangkan RO (Reverse Osmosis) dapat dimenyaring hampir semua kontaminan lebih besar dari molekul air. Membran biasanya terbuat dari serat tenunan, keramik, polimer atau bahan logam [16][38]. Ultrafiltration (UF) adalah salah satu metode yang paling efektif untuk pengolahan air limbah berminyak dibandingkan dengan metode pemisahan tradisional karena efisiensi penghilangan minyak yang tinggi, tanpa bahan kimia tambahan, biaya energi rendah, dan hunian ruang kecil. Metode membrane UF dikatakan unggul dikarenakan metode pencucian membrane terhadap oil berkurang dari 4,6 hari menjadi 2 hari saja dengan konsentrasi minyak dalam production water ke saluran membrane meningkat dari 95 ppm menjadi 187 ppm. Dengan hasil ini, biaya operasi dengan target penghasilan air 25.000 BPD dengan <2 mg/liter minyak diperkirakan 9,7sen/bbl dan pemulihan air juga akan melebihi 98%.

Banyak metode yang digunakan dalam water treatment ataupun absorpsi minyak dalam air diantaranya yaitu: synthetic polymer yang digunakan dengan karakteristik adsorpsi hydrophobic dan oilephilic, contoh dari synthetic polymer adalah Contoh polimer sintetik seperti polyurethane, Polypropylene, polyethylene dan butyl. Namun, kelemahan dari synthetic polymer adalah penguraian sangat lambat, selain itu, bahan ini cenderung fouling dengan memblokir permukaan pori-pori. Lalu yang kedua Natural fiber materials yang digunakan untuk kapasitas absorpsi rendah, contohnya corn stalk, bagasse pith, nonwoven wool dan cotton fibers. Dan yang ketiga yaitu inorganic sorbents yang paling banyak digunakan contohnya vermiculite, exfoliated graphite, sepiolite, zeolites, CNTs [39].

Filtration membran sangat berguna dalam proses pemisahan minyak dalam air [40][41]. Membran polymer sensitif terhadap pelarut polar dan diklorinasi, serta fraksi minyak yang tinggi. Dan membran keramik, khususnya membran membran zirkonia menunjukkan hasil pemisahan yang lebih baik seperti fluks yang lebih tinggi. Untuk kandungan minyak dari permeat dianalisis menggunakan spektrofotometri UV [42] dan nilai COD ditentukan pada proses oksidasi kalium dikromat konvensional. Menggunakan membran berfungsional ganda yang dilapisi PDA / PEPA / SH yang secara bersamaan dapat menghilangkan minyak dari air dan menyerap ion merkuri yang larut dalam air. Membran dual-fungsional mampu menyerap ion merkuri dalam air melalui interaksi afinitas secara terbalik dan efisien. Membran fungsional ganda memiliki kemampuan memisahkan campuran minyak/air dan menyerap polutan terlarut secara reversible. Selain itu, membran fungsional ganda dapat digunakan berulang kali dan mempertahankan efisiensi pemisahan dan adsorpsi yang tinggi, yang sangat mengurangi biaya pengolahan air limbah dan memiliki potensi besar untuk pengolahan air limbah skala besar industry. Diindikasikan bahwa membran masih memiliki kapasitas adsorpsi yang kuat (100%) dan efisiensi pemisahan yang tinggi (99%) setelah lima kali digunakan [43].

#### **1. Membran serat tenun**

Membran serat mikrofiltrasi anyaman (WFMF) adalah serat berbasis polyester yang bersumber secara lokal dan dipasok oleh Gelvenor Consolidated Fabrics (PTY) Ltd di Durban, Afrika Selatan. Ukuran pori membran tidak diketahui, oleh karena itu ditentukan menggunakan modifikasi metode pengecualian (MSE). Percobaan dilakukan dengan membran WFMF ditempatkan dikertas saring. Kekeruhan pakan dan filtrat diukur dan

dicatat. Filtrat kekeruhan membran WFMF dibandingkan dengan kertas filter individu dan bahwa air deionisasi untuk memeriksa persentase penolakan. Ukuran pori WFMF membran disimpulkan sama dengan kertas saring dengan kapasitas penolakan yang sama [44].

## **2. Ceramic Membrane**

Bahan baku yang digunakan untuk menyiapkan membran keramik adalah Tanah liat merah Maroko (RC) digali dari wilayah Safi dan alami fosfat diekstraksi dari Youssoufia (Maroko). Bahan kimia utama komposisi tanah liat merah yang diberikan dalam persentase berat adalah sebagai berikut: SiO<sub>2</sub> (52,79 wt%), Al<sub>2</sub>O<sub>3</sub> (17,44 wt%), Fe<sub>2</sub>O<sub>3</sub> (5,08wt%). Alami fosfat sebagian besar kaya P<sub>2</sub>O<sub>5</sub> (19,94 wt%) dan CaO (39,34 wt%). Itu juga mengandung SiO<sub>2</sub> (9,26 wt%) dan jumlah rendah Al<sub>2</sub>O<sub>3</sub> (0,58wt%) dan Fe<sub>2</sub>O<sub>3</sub> (0,28 wt%). Fosfat dipilih sebagai agen pembentuk pori alami karena tingginya kandungan bahan organik, yang memungkinkan kita membuang aditif sintetis untuk membuat pori-pori [45][46].

## **3. Flocculation dan ceramic membran filtration**

Memilih satu set kondisi operasi optimal adalah hal yang penting dalam filtrasi membran yang mempengaruhi fluks filtrasi, kualitas permeat dan tingkat fouling membran [47]. Dalam penelitian ini, kondisi operasi utama adalah tekanan transmembran dan kecepatan cross-flow [48]. Konsisi flokulasi yang optimal ditentukan pada percobaan ortogonal dari empat faktor. Keempat faktor tersebut adalah dosis flokulan, waktu pengadukan, waktu penahan setelah flokulasi, dan suhu flokulusi. Flokulan dimulai melalui membran selama 120 menit dan digunakan kembali sampai fluks air murni menurun sekitar 20 %. Setelah flokulasi dianalisis dengan uji ekstraksi minyak bumi kemudian kandungan minyak dari permeat dianalisis dengan spektrofotometri UV [42].

## **4. Nanofibers PI elektrospol berkekuatan tinggi digunakan sebagai matriks membran**

Membran PI nanofibro dibuat menggunakan perangkat electrospinning FM1206 [49]. Spektrum resonansi magnetik nuklir (<sup>1</sup>H NMR) proton direkam menggunakan spektrometer Avance III HD 600 MHz (Bruker BioSpin). Sifat-sifat struktural membran dikarakterisasi dengan FT-IR. Secara khusus, spektrum absorbansi direkam menggunakan spektrometer Nicolet 360 FT-IR dengan 32 pemindaian pada resolusi 4 cm<sup>-1</sup> pada kisaran 400-4000 cm<sup>-1</sup>. Morfologi membran dikarakterisasi dengan mikroskop elektron transmisi (TEM) (JEM) -1400, JEOL, Jepang) dan pemindaian emisi lapangan mikroskop elektron akuscript FE-SEM (S-4800. Hitachi. Ltd., Jepang). FE-SEM dilengkapi dengan Energy Dispersive Spectrometer (EDS)[50].

## **5. Membran premix SPG**

Membran SPG hidrofilik dan hidrofobik disediakan oleh SPG Technology Co. Ltd (Miyazaki, Jepang). Membran SPG hidrofilik digunakan untuk produksi nanoemulsi O / W dan hidrofobik untuk nanoemulsi W / O. Kedua membran pertama kali diproduksi dengan cara yang sama, membran hidrofobik kemudian diperoleh berkat lapisan khusus yang dibuat oleh pemasok. Membran berbentuk tabung dengan diameter bagian dalam 8,5 mm, tebal 0,8 mm dan panjang 125 mm. Dalam semua percobaan, panjang membran adalah 125 mm dan ukuran pori rata-rata 0,5  $\mu\text{m}$ . Membran mampu menahan tekanan transmembran hingga 65 bar. Modul tubular lintas-aliran diadaptasi untuk digunakan dalam PME. Panjang efektif membran berkurang karena cincin penyegelan ditempatkan di kedua ujung tabung membran. Oleh karena itu, panjang efektif adalah 115 mm dan luas membran efektif adalah 30,70  $\text{cm}^2$ . Untuk nanoemulsi O / W sebelum digunakan, membran dibersihkan dengan hati-hati sampai pemulihan resistensi hidrodinamik terhadap air ( $R_m$ ). Untuk pengukuran resistensi hidrodinamik, air diserap melalui membran pada laju alir yang berbeda antara 10 dan 200 mL / menit dan tekanan yang dihasilkan diukur.  $R_m$  diperkirakan dari slop aliran air ultra murni versus tekanan yang dihasilkan [51]. Prosedur pembersihan terdiri dari tiga suntikan melalui membran 500 mL larutan Derquim + 1% [52] pada 70 ° C pada 200 mL / menit dan kemudian tiga suntikan 500 mL air murni pada suhu kamar dan 200 mL / mnt. Resistensi membran terhadap air pulih setelah perawatan ini. Untuk nanoemulsi W / O, membran dibersihkan dengan hati-hati dengan Span 80 di Marcol 82 sampai solusi yang jernih dipulihkan dan tekanan stabil. Mengisi membran dengan minyak memungkinkan aliran emulsi yang lebih baik melalui membran tersebut [53].

## **6. Organoclay**

Organoclay merupakan water treatment dengan menghilangkan hydrocarbon terlarut seperti Benzena, toluene, etilbenzena dan xilena (BTEX) [54][55]. Sebelum organoclay rilis, GAC (Garnular Active Carbon) yang menjadi treatment ini dan telah menjadi standar de facto. Namun organoclay memiliki keunggulan dibandingkan GAC yakni adsorpsi yang lebih tinggi 60 hingga 70% dan merupakan metode paling efisien dalam menghilangkan HC yang terlarut, kemudian media bekas dari metode ini tidak menjadi limbah yang berbahaya [32].

## **7. Carbon nanotubes (CNT)**

penelitian ini menggunakan dua tipe carbon nanotube (CNT), yaitu : Commercial CNT (C-CNT) dan Produced CNT (P-CNT). Diameter rata-rata dari CNT berkisar antara 20-50 nm [3]. Metode yang sama namun berbeda bahan yang digunakan adalah (2) hydrophobic non-woven fabric yang dilapisi dengan polydivinylbenzene nanofibers. Sebelum dilakukan pemisahan hydrophobic non-woven direndam dalam bahan kimia OTS (octadecylsilane) selama 12 jam. Lalu memasukan hydrophobic non-woven kedalam cairan yang mengandung emulsi minyak-air[56]. Banyak metode sama yang digunakan seperti nanocomposites yang berasal dari bahan kimia  $\text{Fe}_3\text{O}_4/\text{SiO}_2$ ,  $\text{Fe}_3\text{O}_4/\text{TiO}_2$ , and 16  $\text{Fe}_3\text{O}_4/\text{Chitosan}$  nanocomposites [57], metode superhydrophobic nanodiamonds dengan menambahkan hydroxyl, pada umumnya cara kerjanya sama dengan nanotubes, namun nanodiamonds dengan menambah superhydrophobic sponge dalam metode yang digunakan, metode ini merubah nilai PH dengan menggunakan cairan alkaline (PH 8,5) [58], metode nanofibrous yang dikombinasikan dengan electrospun fibers, electrospun fibers digunakan untuk menurunkan nilai wettability dari minyak sehingga akan lebih mudah dalam proses pemisahannya [59].

## **8. Kombinasi dengan bahan synthetic polymer**

Metode membran dengan mendepositkan serat kopolimer yang responsif PH, serat membran sebelum digunakan telah dibasahi dengan air yang memiliki PH3 (air asam), lalu serat membrane ini memiliki pori sebesar  $9\text{ }\mu\text{m}$  [60], (2) mesh film yang dilapisi dengan bahan kimia ZnO, lalu dipanaskan dengan suhu 420 C, hal ini bertujuan untuk memperkecil pori film, nanorod ZnO ini memiliki diameter pori sebesar  $50\text{ }\mu\text{m}$  [61], (3) amorphous carbon thin film (ACTF) yang serat membran dari bahan organik di buat dari daun kelapa sawit (OPL) [62], (4) menggunakan nano filtration untuk memisahkan, namun, membran yang digunakan adalah oleophobic[63], (5) menggunakan membran yang di campur dengan bahan kimia POLY TETRAFLUOROETHYLENE (PTFE) [64].

### **Coagulation**

Koagulasi dan pemisahan busa menggunakan kasein telah menunjukkan potensi tinggi sebagai metode alternatif untuk flotasi udara terlarut (DAF) untuk memproses air minyak emulsi. Ketika mengontrol dosis kasein dalam kondisi koagulasi yang baik, 96-99% removal minyak dimungkinkan untuk air limbah berminyak. Hasilnya menunjukkan bahwa sisa minyak dalam air yang diproduksi dapat mencapai konsentrasi kurang dari  $5\text{ mg/L}$  [65][66].

### **Uji centrifuge, hidrosiklon, membran dan inhibitor korosi**

Uji Centrifuge dapat membantu mengurangi tingkat minyak dalam air yang diproduksi di bawah 10 mg/liter. Untuk uji hidrosiklon tidak terlalu efektif dalam mengurangi minyak dalam air. Sedangkan dari keempat membran yang diuji, membran filtrasi mikro hidrofilik (WFF) menunjukkan perilaku kapasitas terbaik dari waktu ke waktu dan kerentanan terhadap pengotoran. Bahkan pada konsentrasi minyak yang tinggi sekalipun, membran mampu untuk menghilangkan tetesan kondensat minyak dari air. Uji Inhibitor yang diinjeksikan pada tingkat optimal berhasil secara signifikan mengurangi kandungan minyak dalam air yang diproduksi hingga 12 mg / liter dan mengurangi efek korosif dari asam karbonat yang ada dalam fase air [22].

### **Gravity Separation**

Pemisahan dengan bantuan gravitasi adalah langkah awal yang paling umum dilakukan menggunakan alat seperti *gravity separator*, *API separator* maupun *skim tank*. Keefektifan dari metode tersebut tergantung dari desain *retention time*, sifat fluida nya dan additive yang ditambahkan dalam mempercepat pemisahan [6][67].

### **Demulsifikasi**

Pretreatment dilakukan dalam kasus ini, dengan 3 langkah yang dilakukan secara berkala yakni pembuangan minyak dengan sedimentasi, penghapusan minyak dengan demulsifikasi dan pemsahan flotasi. Perbaikan emulsi oil and water ini juga dapat digunakan sebagai metode EOR pada waterflood layaknya Iranian Oil Field. Namun, pada kasus ini diperlukan penambahan tes flooding packing HP-HT [68].

### **Elektrochemical**

Teknik berbasis elektrokimia ini merupakan hasil pengembangan bahan-bahan elektroda seiring waktu dan menjadi suatu elektro terapan yang luas. Dengan menghilang garam anorganik pada air, logam berat dan radikal asam, dan tentunya yang paling penting menghilangkan polutan organik dan partikel koloid tertentu [69]. Teknik electrochemical yang digunakan untuk daur ulang cairan, dan padatan inferior dalam cairan dihilangkan tanpa adanya penambahan zat kimia [70].

### **Filtrasi menggunakan media granular**

Salah satu sumber limbah berminyak adalah industri kilang minyak adanya pencemaran lingkungan yang terjadi selama tahap produksi, transportasi, pemurnian maupun penggunaannya. Media filter *walnut shell* dibuat menggunakan *Sieve Analysis* sesuai dengan ASTM D422-63. Filtrasi menggunakan metode *compression* [71]. Terdapat berbagai macam masalah terhadap operasi industri mengenai pemisahan atau pembuangan limbah air yang mengandung sejumlah emulsi. Metode yang dilakukan dengan percobaan filtrasi menggunakan media filter kenaf [72]. Penyaringan secara konvensional menggunakan pasir telah ditinggalkan dengan pemanfaatan media granular seperti kulit kacang [73]. Metode yang digunakan eksperimen dengan sampel di laboratorium, sampel berminyak yang baru dikumpulkan dari limbah kilang Al-Duara, dan uji batch laboratorium dilakukan dengan mencampur dan mengocok [74]. Jumlah volume air produksi yang dihasilkan pada suatu lapangan minyak dan gas yang sangat kompleks dan besar perlu dilakukannya perawatan yang serius terhadap air limbah tersebut. *Deep-bed filtration* merupakan teknologi yang tepat dalam proses pengolahan pemisahan antara air dan minyak. Menggunakan serat tanaman sebagai media penyaring sangat dianjurkan, dimana bahan limbah empulur bunga matahari ini ditinggalkan begitu saja di ladang atau dibakar sebagai biomassa. Pengujian empulur bunga matahari menggunakan SEM dan FTIR *Spectroscopy* [46][75][76]. Percobaan terhadap efisiensi adsorpsi dilakukan dengan filtrasi menggunakan media filter empulur bunga matahari [77]. Pengaruh *water production* yang semakin signifikan terhadap lingkungan, sehingga diperlukannya *re-injection* terhadap lapangan *onshore*, terutama lapangan *offshore* dimana pembuangan ke laut diharapkan dapat dikurangi. Teknik pengumpulan data dari pemasok teknologi secara langsung, konsultan, kontraktor dan pengguna terakhir teknologi *produce water re-injection* serta melalui referensi teks buku [1]. Buluh *papyrus* merupakan salah satu jenis limbah hasil pertanian yang digunakan dengan alasan menjadi biosorben murah guna menghilangkan minyak yang terkandung dalam air yang diproduksi di ladang Al-Ahdab, Irak. Hal ini dilakukan karena untuk mengelola air limbah diperlukan biaya yang tinggi, maka digunakan bahan alternatif yang lebih efisien menjadi adsorben. Metode yang digunakan untuk mengkarakterisasi buluh *papyrus* menggunakan pengujian FTIR dan SEM sedangkan adsorpsi menggunakan metode eksperimental Freundlich dan Langmuir *absorption isotherms* [7]. Sejumlah air diproduksi selama produksi minyak dan gas. Sebagian besar yang

tersebut dimasukkan kembali atau *re-injection*. Cara ini tidak selalu layak dilakukan karena hal biaya dan pertimbangan geografis. Sebagai contoh pada ladang minyak Montana yang lebih memilih melakukan pengolahan yang digunakan kembali air yang diproduksi daripada *re-injection* dan digunakan kembali di daerah rawan kekeringan atau daerah kering. Metode yang digunakan terdiri dari tiga tahap, yaitu *Pretreatment*, *Membran Filtration* dan *Post Treatment* [78]. Fase akhir dari produksi suatu ladang minyak ditandai dengan jumlah air yang diproduksi lebih dari 90%. Pengolahan air ini merupakan suatu proses yang mahal terlepas dari harga minyak dan biasanya volume air ini disiapkan untuk dilakukan penginjeksian kembali ke dalam tanah atau akuifer yang sesuai. Metode yang digunakan adalah sebuah pohon keputusan terhadap sifat formasi tempat air yang telah diolah untuk *re-injection* [6].

### 3. RESULT

#### Adsorbition

Menggunakan ketiga bahan composite biopolymer hybrid didapatkan efisiensi adsorpsi yang berbeda. Karena hal ini sangatlah dipengaruhi oleh waktu kontak, pH, dosis, konsentrasi minyak awal dan suhu dari masing-masing bahan. Hasilnya didapatkan bahwa kapasitas adsorpsi minyak ditemukan menjadi 91, 82 dan 45% masing-masing untuk komposit La @ CS-GEL, Zr @ CS-GEL dan Ce @ CS-GEL [23]. Dengan Kapasitas adsorpsi sorben minyak PDMS berkisar dari 4 hingga 34 g / g untuk berbagai minyak. Karena hidrofobik dan oleofilisitasnya, sorben PDMS mampu secara selektif menghilangkan minyak dari air berminyak, dan proses adsorpsi sangat cepat (10 s). selain memiliki kapasitas adsorpsi yang tinggi, sorben ini juga dapat digunakan kembali sebanyak 20 kali setelah penggunaannya [24]. Penambahan rGO di Natural Rubber meningkatkan kapasitas adsorpsi minyak bumi lebih tinggi dari 70% setelah 30 penggunaan. Dan ini adalah sorben minyak alternatif yang menjanjikan untuk removal tumpahan minyak di bawah kondisi lapangan kritis di laut [25]. Penggunaan ZFHA sebagai metode baru ini memiliki potensi yang menjanjikan untuk produksi skala besar untuk digunakan sebagai bahan adsorben untuk removal sisa minyak bumi dari air limbah berminyak di berbagai bidang industri perminyakan Mesir. Dan ZFHA adsorben ini hanya bisa digunakan sebanyak 3 kali setelah saturasi. Setelah dilakukan pengujian secara experimental dengan 3 siklus yang berbeda didapatkan efisiensi removal untuk masing-masing menjadi 98%, 95% dan 91% [26].

### **Gas flotation**

Metode floatation (DAF) semakin tinggi konsentrasi aluminium sulphate, semakin rendah residu konsentrasi minyak di air dengan keefektifan hingga 88%. Persentase oil removal juga dihasilkan dari air to oil ratio, dengan kondisi optimum DAF ada pada konsentrasi  $7.4 \times 10^{-3}$  air to oil ratio. Maximum rate akan dicapai ketika ZETA potensial adalah 0. Hasil dari polimer berat yaitu hydracoll 882 dan 864 cenderung menghasilkan nilai positif, sementara polimer ringan sebaliknya, dengan nilai zernya negatif. Secara umum performansi dari alat DAF akan meningkat dengan mengimprove working pressure dimana micro bubble nya dihasilkan [28]. Waktu penyerapan minyak meningkat ketika ditambahkan coal ke proses DAF, dimana tipe antrasit paling banyak menyerap minyak dilanjutkan lignite dan lean coal. Sementara efek ukuran coal adalah semakin besar coal akan meningkatkan keefektifan penyerapan minyak, dengan maksimal ukuran  $2,046 \mu\text{m}$ . Jenis coal anthracite, lean coal dan lignite yang diuji didapatkan Anthracite merupakan coal dengan keefektifan tinggi dengan ukuran coal yang diatur.

PVDF (FR904) atau Dimethylacetamide (DMAC, >99%, reagent) yang digunakan sebagai solvent dan beberapa additives seperti sodium hexaphosphate dan polyvinylpyrrolidone (PVP) [79][80]. Dengan beberapa tambahan tersebut, didapatkan recovery permasi mencapai 100% dengan pencucian surfactant 1 wt% OP-10 surfactant solution (pH 10). Selain itu, Dengan penambahan flocculation pada alat filtrasi, akan meningkatkan efisiensi pembersihan air [81][82], keberhasilan rata-rata dapat berkurang dari 150 L/m<sup>2</sup>h menjadi 108 L/m<sup>2</sup>h dalam mengatasi COD dan mengurangi oil content dari 34.68 g/l menjadi 8.762 g/l dimana mencapai standar kriteria limbah air yaitu COD kurang dari 150 L/m<sup>2</sup>h dan oil content kurang dari 10 g/l. Dengan menambahkan flocculation pada alat filtrasi sangat efektif dalam mengurangi oil content dan COD dari wastewater. 3530S atau turunan dari polyacrylamide merupakan flocculation yang paling optimal dengan kondisi yang diatur dengan dosis 70 mg/L, suhu 40 celcius, waktu pencampuran 90 menit dan waktu tunggu 90 menit.

### **Cyclones Separation**

Dengan system ini, efisiensi berkisar 90% dengan konsentrasi minyak dan air yang diolah sekitar 60 mg/liter. Metode ini berada pada area optimal GLR 9 hingga 10%, jika GLR diluar ini maka efisiensi pemisahan berkurang [32].

## Membrane

Membran berfungsional ganda yang dilapisi PDA / PEPA / SH yang secara bersamaan dapat menghilangkan minyak dari air dan menyerap ion merkuri yang larut dalam air. Membran dual-fungsional mampu menyerap ion merkuri dalam air melalui interaksi afinitas secara terbalik dan efisien. Membran fungsional ganda memiliki kemampuan memisahkan campuran minyak/air dan menyerap polutan terlarut secara reversible. Selain itu, membran fungsional ganda dapat digunakan berulang kali dan mempertahankan efisiensi pemisahan dan adsorpsi yang tinggi, yang sangat mengurangi biaya pengolahan air limbah dan memiliki potensi besar untuk pengolahan air limbah skala besar industry. Diindikasikan bahwa membran masih memiliki kapasitas adsorpsi yang kuat (100%) dan efisiensi pemisahan yang tinggi (99%) setelah lima kali digunakan [43]. Dengan menggunakan membran keramik menghasilkan kecepatan aliran silang melalui membran berada dalam kisaran 0,6–1,3 m/s. Fluks permeat bervariasi dari 3,4 hingga 3300 L / (h m<sup>2</sup> bar) pada tekanan trans-membran 1 bar dan umpan suhu air 60 ° C. Menggunakan membran MF (0,1 µm) dan solusi pemodelan menghasilkan air, meresap fluks menurun dari awalnya 1150 menjadi 200 L / (h m<sup>2</sup>) setelah 5 jam. Memanfaatkan membran UF (0,05 µm), penghilangan oli naik hingga 99% dan penghapusan TOC hingga 39% tercapai [83]. Menurut penelitian yang dilakukan oleh Hoslett et al., (2018) menghasilkan komposit resin yang disiapkan lebih efisien daripada yang komersial dalam hal CIE, PC, dan porositas, hal itu mengkonfirmasi kemampuannya untuk menyerap minyak mentah dari air yang terkontaminasi. Kartrid SPE resin komposit yang disiapkan berhasil digunakan untuk perawatan PPW. Dengan menggunakan 10 g komposit resin yang disiapkan untuk perawatan 1000 ml PPW, jumlah 99,9% penghilangan minyak tercapai, di mana konsentrasi minyak menurun dari 148,5 menjadi 1,13 g / l. Hal itu penting untuk menerapkan perawatan lebih lanjut menghapus konsentrasi minyak residu dari PPW yang diolah. Konsekuensinya, PPW yang dirawat sebelumnya mengalami mikrofiltrasi (MF) unit skala laboratorium. Efluen akhir yang diolah bebas minyak. Disimpulkan bahwa sistem terintegrasi yang diteliti menggunakan Komposit resin berpori baru yang diikuti oleh MF dapat berhasil mencapai 100% penghilangan minyak mentah dari PPW.

Membran mikrofiltrasi keramik datar disiapkan pada 1100 ° C melalui proses pemadatan kering uniaksial dengan mencampur murni Maroko mineral alami tanah liat merah dan fosfat alami. Fosfat alami mampu menghasilkan struktur berpori. Efek dari penambahan fosfat alami

(berat 10-40%) pada struktur mikro dan mekanik properti dievaluasi. Kinerja mikrofiltrasi yang dipilih membran keramik diperiksa secara eksperimental dengan berbagai variasi feed. Berdasarkan penelitian ini, didapatkan hasil Analisis SEM mengungkapkan struktur yang lebih berpori untuk keramik membran mengandung 40% berat NPh dibandingkan dengan berat 10 dan 20%. Ukuran pori utama adalah sekitar 2,5  $\mu\text{m}$ . Penurunan kekuatan lentur yang signifikan dari 37,44 menjadi 17,5 MPa diamati dengan meningkatnya jumlah fosfat alami karena peningkatan porositas. Rasio massa optimal dari tanah liat / fosfat dikonfirmasi sebagai 3: 2. Membran keramik yang optimal memiliki koefisien ekspansi termal kurang dari  $13,42 \times 10^{-6} \text{ }^{\circ}\text{C}^{-1}$ , tahan guncangan termal yang tinggi hingga  $1100 \text{ }^{\circ}\text{C}$ , kekuatan lentur yang baik (17,72 MPa), korosi alkali yang kuat resistensi dan permeabilitas yang baik dari 928 L / (h  $\cdot$  m<sup>2</sup>  $\cdot$  bar). Dukungan menunjukkan peningkatan efisiensi penghilangan kekeruhan untuk Fe limbah penyamakan rumah kayu (99,80%), air laut mentah (99,62%) dan air garam sintetis (99,86%) [45]. Dalam penelitian mengkonfirmasi kegunaan membran keramik untuk pemisahan kaldu fermentasi. Dilakukan dengan kaldu, yang disiapkan menggunakan Bakteri *Citrobacter freundii*. Sebuah membran keramik ultrafiltrasi ketat tubular (8 kD) diterapkan dan penolakan lengkap bakteri dan padatan tersuspensi lainnya tercapai. Rembesan yang dihasilkan adalah jelas, dengan kekeruhan pada tingkat 0,1 NTU yang memungkinkan untuk menggunakan solusi tersebut untuk lebih lanjut pemisahan dalam proses nanofiltrasi dengan penggunaan spiralwound modul. Pemisahan larutan gliserol yang difermentasi oleh bakteri mengungkapkan bahwa penurunan fluks terus menerus terjadi selama ultrafiltrasi kaldu dengan membran UF keramik. Setelah inisial penurunan cepat dari permeat fluks periode kuasi-konstan laju filtrasi diamati, pada tingkat maksimum 0,2-0,3 meresapi fluks. Penerapan pembilasan modul 20–30 menit dengan 1% Solusi NaOH diizinkan untuk secara efisien menghilangkan kontaminasi dari membran, bahkan setelah tiga hari eksploitasi. Penerapan proses ultrafiltrasi untuk pengobatan solusi dengan metabolit yang terbentuk dari bakteri, diizinkan untuk diperoleh pada peningkatan sebesar 30-40% hasil biosintesis 1,3-PD dari gliserol [85]. Dalam kasus organoclay digunakan dalam kombinasi dengan GAC. Organoclay sendiri diproduksi dengan menggabungkan lempung natrium montmorillonite dengan garam amina kuaterner kationik sebagai penghilang pilar organik diantara trombosit clay yang meningkatkan jarak dan sebagai fasilitator pembentukan HC. Dengan metode ini didapatkan

hasil bahwa tingkat penghapusan BTEX berkisar Benzene 27%, Toluena 58%, Ethylbenzene 72% dan Xylene 71% [32].

Untuk mengetahui tingkat efisiesi dari penyerapan CNT digunakan analisis thermogravimetric untuk mengukur tingkat maksimum penyerapan CNT dimana hasilnya didapat untuk P-CNT =97% dan C-CNT = 87%, dalam metode hydrophobic non-woven fabric dengan menambahkan bahan kimia OTS (octadecylsilane) dapat meningkatkan penyerapan minyak dari air sebesar 7,2 g/l, dimana merupakan hasil tertinggi dibanding metode nanofibers. Dalam hal stabilitas emulsi, secara mikroskopis menunjukkan bahwa semua nanokomposite yang disintesis memiliki kinerja yang lebih baik dalam menstabilkan pemisahan emulsi. Pengukuran IFT(interfacial Tension) menunjukkan penurunan 18-21 mN / m, dengan penurunan nilai IFT menunjukan bahwa proses pemisahan berhasil digunakan dengan menambah nanocomposite pada emulsi minyak-air [57]. Metode superhydrophobic nanodiamonds mendapatkan efisiensi sebesar 76%, tidak terlalu besar dibanding metode lainnya namu ada kelebihan dibanding metode lainnya yaitu biaya lebih murah dan memiliki stabilitas dan performa yang baik [86], metoda nanofiber yang dikombinasikan denga electrospun dapat meningkatkan efisiensi hingga 99%.

Dengan menggunakan membrane yang meliki jenis yang berbeda telah berhasil memisahkan minyak-air yang berasal dari paraffin cair , minyak diesel. Dari beberapa metode membrane didapat efisiensi tingkat efisiensi >90% and memiliki kelebihan penggunaanya dalam jangka waktu yang panjang [64].Pada umumnya proses absorpsi ataupun pemisahan minyak dipengaruhi oleh beberapa fako seperti contact time, oil concentration pada suatu emulsi [87].

### **Coagulation**

Flokulasi dapat menurunkan kadar minyak dan nilai COD air limbah berminyak yang mengandung lumpur. Flokulan yang optimal adalah 3530S yang merupakan turunan dari poliakrilamida. Standar selektif adalah kadar minyak dan nilai COD limbah setelah flokulasi. Kondisi flokulasi termasuk dosis flokulan, suhu, waktu pengadukan dan waktu penahanan setelah pengadukan ditentukan oleh percobaan ortogonal, dan kondisi optimum adalah dosis 70 mg / l, suhu 40 ° C, waktu pengadukan 90 menit dan waktu penahanan 90 min. Peleburan membran menurun dan fluks filtrasi meningkat dengan flokulasi sebagai perlakuan awal. Kualitas permeat setelah flokulasi dengan 3530S dan MF menggunakan 0,2 µm membran ZrO<sub>2</sub>

lebih baik daripada hanya setelah MF, dan dapat memenuhi Standar Debit Nasional [82]. Potensi pemisahan minyak dalam air dari membran dual-responsif yang inovatif ini diselidiki menggunakan beberapa campuran model minyak dalam air. Membran memiliki fluks yang sangat tinggi (6500 t 100 L-m-2-h-1) dan efisiensi pemisahan (> 99%) dan dapat digunakan kembali. Selain itu, uji stabilitas termal dan ketahanan abrasi menunjukkan bahwa membran sangat stabil dalam kondisi ekstrem [49]. Dalam penelitian yang telah dilakukan [88], nanoemulsi O / W dan W / O disiapkan dengan sukses oleh membran PME dan SPG. Untuk itu, set-up terkontrol termasuk jarum suntik bertekanan tinggi dan modul membran dalam mode PME, dikembangkan dalam penelitian kami sebelumnya, digunakan [49]. Karena tekanan melalui membran harus lebih rendah dari 65 bar, kami menyelidiki efek viskositas fase kontinu, fase terdispersi, dan konten fase berbeda untuk dapat menghasilkan nanoemulsi kental O / W dan W / O dengan sukses.

#### **Demulsifikasi**

Hasil dari penelitian ini menunjukkan bahwa lebih dari 95% minyak dapat diperoleh dari air limbah dan limbah cair ini sepenuhnya memenuhi syarat untuk treatment konvensional, ini diverifikasi dan proses treatment nya digunakan dalam 60 t/jam [68][89].

#### **Elektrochemical**

Pada metode ini berhasil menghilangkan padatan inferior dengan ukuran  $10^{-10}$  mm setelah sampel air limbah diolah dengan electrochemical. Layaknya di India, air yang dihasilkan dari treatment ini juga memiliki dampak positif disamping memikirkan dampak negatifnya seperti ekotoksitasitas terrestrial dan potensi pemanasan global [90][70].

#### **Filtrasi menggunakan media granular**

Media filter *walnut shell* dibuat menggunakan *Sieve Analysis* sesuai dengan ASTM D422-63. Filtrasi menggunakan metode *compression*, menunjukkan kapasitas penyerapan 0,30 g/g menghasilkan kapasitas penyerapan sebesar 0,56 g/g. Sampel mineral standar, 0,51 g/g untuk sampel *vegetable oil* menghasilkan kapasitas penyerapan sebesar 0,58 g / g. Sampel minyak DoALL Bright-Edge kapasitas penyerapan 0,58 g/g menghasilkan kapasitas penyerapan sebesar 0,74 g/g [71]. Metode yang dilakukan dengan percobaan filtrasi menggunakan media filter kenaf menghasilkan sekitar 70 hingga 95 % dapat tercapai penghilangan minyak dan lemak dalam limbah air 500 mg/L dengan penstabil surfaktan [72]. Penghapusan minyak hingga 96% dari sampel buatan dicapai sementara hasil tes menunjukkan bahwa 75% minyak

dapat dihilangkan dari air limbah aktual yang dikeluarkan dari kilang Al-Duara di selatan Baghdad [74]. Tingkat efisiensi filtrasi menggunakan media empulur bunga matahari terhadap minyak dari air produksi hampir 99% [77]. Pada lapangan *offshore* dengan menggunakan teknologi HC, IGF dan CFU merupakan pilihan terbaik. Melakukan kombinasi dengan teknologi NSF dan CMF dapat memberikan efisiensi yang akan lebih menguntungkan [1]. Berdasarkan hasil yang diperoleh menunjukan buluh *papyrus* efektif dan efisien untuk menghilangkan minyak dan dapat secara signifikan digunakan sebagai adsorben yang murah dan ramah lingkungan untuk pengolahan air yang dihasilkan. Hasil yang baik oleh metode Freundlich dengan data eksperimen  $n < 1$  yang menunjukan adsorbs yang menguntungkan. Selain itu, apabila konsentrasinya ditingkatkan menjadi 5000 ppm dari 1000 ppm persentasi *oil removal* menjadi 87,6 % dari 50,8 % [7]. Menguji kelayakan RO dan membran UF untuk penggunaan multi-manfaat dari air yang diproduksi. Mekanisme ini menghasilkan kinerja keseluruhan yang sangat efektif dari MDU dan filter. Biaya pengolahan air yang diproduksi lebih murah (\$ 0,775 / barel) daripada membuangnya dengan injeksi (\$ 0,75-8 / barel) dan air yang diolah ini mungkin bernilai tinggi di daerah miskin air. Berdasarkan beberapa parameter yang diuji menunjukkan kelayakan air setelah melalui pengolahan tiga tahap tersebut sebagai contoh untuk aplikasi potensial dari air yang diolah membran untuk irigasi pertanian perlu mempertimbangkan tingkat konduktivitas air produk dan konsentrasi ion natrium, kalsium, dan magnesium dan untuk standar air minum (500 mg / L TDS) dan standar air irigasi (1.000 mg / L TDS) memenuhi syarat [78]. Manajemen yang terstruktur diperlukana untuk memenuhi persyaratan pengelolaan air dalam memenuhi peraturan lingkungan yang berlaku. Penginjeksian kembali air ke lapisan bawah tanah dan akuifer lebih banyak digunakan. Masalah terbesar yang dikhawatirkan adalah penurunan injeksi selama proses injeksi dan perlu memastikan injeksi jangka panjang untuk menejegahnya [6].

#### 4. CONCLUSION

Banyak metode yang digunakan dalam water treatment ataupun absorpsi minyak dalam air yang memiliki keunggulan masing-masing dalam setiap metodenya. Dimana dapat disimpulkan kelebihan dari setiap metode-metode tersebut diantaranya:

- Penggunaan metode adsorpsi menunjukkan efisiensi yang lebih besar karena proses yang sederhana, ramah lingkungan, pengeluaran operasional rendah dan pemulihan adsorben yang mudah.

- Pada Cyclones Separation, metode Double Cone Air Sparged Hydroclone (DcASH) merupakan cara yang efektif dalam peningkatan kualitas air pada polymerflood.
- Teknologi membrane (MBR) telah menjadi komponen utama dalam reklamasi air skema karena kemungkinan menyediakan air berkualitas tinggi. Selain itu, teknik ini hemat biaya untuk mendapatkan limbah yang diolah.
- Koagulasi dan pemisahan busa menggunakan kasein telah menunjukkan potensi tinggi sebagai metode alternatif untuk flotasi udara terlarut (DAF) untuk memproses air minyak emulsi.
- Membran filtrasi mikro hidrofilik (WFF) menunjukkan perilaku kapasitas terbaik dari waktu ke waktu dan kerentanan terhadap pengotoran. Bahkan pada konsentrasi minyak yang tinggi sekalipun, membran mampu untuk menghilangkan tetesan kondensat minyak dari air.

Dalam pengolahan air yang diproduksi perlunya teknologi yang memenuhi karakteristik limbah air yang akan diolah. Pemilihan teknologi yang terbaik didasarkan oleh komponen kimiawi yang terdapat pada air, efektifitas biaya, ketersediaan ruang, rencana pengolahan, waktu operasi, dan produk tambahan yang akan digunakan (sampingan). Meskipun air tersebut beracun dengan teknologi yang sesuai air itu dapat diolah dan dapat digunakan ulang untuk kegiatan penginjeksian, sebagai air minum, dan memenuhi kebutuhan negara-negara yang kekurangan air.

## DAFTAR PUSTAKA

- [1] S. Judd *et al.*, "The size and performance of offshore produced water oil-removal technologies for reinjection," *Sep. Purif. Technol.*, vol. 134, hal. 241–246, 2014.
- [2] T. D. Kusworo, N. Aryanti, Qudratun, dan D. P. Utomo, "Oilfield produced water treatment to clean water using integrated activated carbon-bentonite adsorbent and double stages membrane process," *Chem. Eng. J.*, vol. 347, no. April, hal. 462–471, 2018.
- [3] H. Albatmi, H. Qiblawey, F. Almomani, S. Adham, dan M. Khraisheh, "Polymeric adsorbents for oil removal from water," *Chemosphere*, vol. 233, hal. 809–817, 2019.
- [4] A. Motta, C. Borges, K. Esquerre, dan A. Kiperstok, "Oil Produced Water treatment for oil removal by an integration of coalescer bed and microfiltration membrane processes," *J. Memb. Sci.*, vol. 469, hal. 371–378, 2014.
- [5] E. L. Hagström, C. Lyles, M. Pattanayek, B. DeShields, dan M. P. Berkman, "Produced Water—Emerging Challenges, Risks, and Opportunities," *Environ. Claims J.*, vol. 28, no. 2, hal. 122–139, Apr 2016.
- [6] S. Nesic dan V. V Streletskaia, "An integrated approach for produced water treatment and injection," *Геоpecыpcы*, vol. 20, no. 1 (eng), 2018.
- [7] F. AL-Zuhairi *et al.*, "Removal oil from produced water by using adsorption method with adsorbent a Papyrus reeds," *Eng. Technol. J.*, vol. 37, no. 05, hal. 157–165, 2019.

- [8] J. Fan, E. N. Sappington, H. S. Rifai, dan D. F. Rodrigues, "Confocal microscopy as a new real-time quantification method for oil content in produced water," *J. Pet. Sci. Eng.*, vol. 167, no. March, hal. 54–63, 2018.
- [9] R. W. Paige, L. R. Murray, J. P. Martins, dan S. M. Marsh, "Optimising Water Injection Performance," *SPE Repr. Ser.*, no. 56, hal. 173–181, 2003.
- [10] Y. S. Li, L. Yan, C. B. Xiang, dan L. J. Hong, "Treatment of oily wastewater by organic–inorganic composite tubular ultrafiltration (UF) membranes," *Desalination*, vol. 196, no. 1–3, hal. 76–83, 2006.
- [11] S. Jiménez, M. M. Micó, M. Arnaldos, F. Medina, dan S. Contreras, "State of the art of produced water treatment," *Chemosphere*, vol. 192, hal. 186–208, 2018.
- [12] A. A. Yousef, S. Al-Saleh, dan M. Al-Jawfi, "Improved/enhanced oil recovery from carbonate reservoirs by tuning injection water salinity and ionic content," *Proc. - SPE Symp. Improv. Oil Recover.*, vol. 1, hal. 819–836, 2012.
- [13] H. I. Abdel-Shafy dan S. H. Abdel-Shafy, "Membrane technology for water and wastewater management and application in Egypt," *Egypt. J. Chem.*, vol. 60, no. 3, hal. 347–360, 2017.
- [14] M. Duan *et al.*, "A novel interface-active cationic flocculant for the oil-water separation of oily wastewater produced from polymer flooding," *J. Mol. Liq.*, vol. 286, hal. 110868, 2019.
- [15] K. M. Bansal dan D. D. Caudle, "Interferences with produced water treatment for dispersed oil removal," *Soc. Pet. Eng. - SPE Int. Conf. Heal. Safety, Environ. Oil Gas Explor. Prod. 1998, HSE 1998*, no. c, 1998.
- [16] H. I. Abdel-Shafy, M. S. M. Mansour, dan M. M. El-Toony, "Integrated treatment for oil free petroleum produced water using novel resin composite followed by microfiltration," *Sep. Purif. Technol.*, vol. 234, no. July 2019, hal. 116058, 2020.
- [17] S. Park, E. S. Lee, dan W. R. W. Sulaiman, "Adsorption behaviors of surfactants for chemical flooding in enhanced oil recovery," *J. Ind. Eng. Chem.*, vol. 21, hal. 1239–1245, 2015.
- [18] Q. Zhang *et al.*, "A facile method to prepare dual-functional membrane for efficient oil removal and in situ reversible mercury ions adsorption from wastewater," *Appl. Surf. Sci.*, vol. 434, hal. 57–62, 2018.
- [19] S. A. Kevin Gunawan, M. Saekhu, Renindra A. Aman, Syaiful Ichwan, Setyo Widi Nugroho, Hanif G. Tobing, "Visual Function Impairment in Sellar Region Tumors: An Initial Study," vol. 4, no. November, hal. 1–3, 2012.
- [20] W. Kang *et al.*, "The effect of stepwise increasing of water injection rates on enhanced oil recovery after preformed particle gel treatment," *J. Pet. Sci. Eng.*, vol. 182, no. March, hal. 106239, 2019.
- [21] C. A. Franco, N. N. Nassar, dan F. B. Cortés, "Removal of oil from oil-in-saltwater emulsions by adsorption onto nano-alumina functionalized with petroleum vacuum residue," *J. Colloid Interface Sci.*, vol. 433, hal. 58–67, 2014.
- [22] F. J. op ten Noort, J. P. Etten, dan R. S. Donders, "Reduction of residual oil content in produced water

at offshore gas production platform P/6A," *Eur. Pet. Conf.*, vol. 1, hal. 9–18, 1990.

- [23] S. S. Elanchezhian, S. M. Prabhu, dan S. Meenakshi, "Effective adsorption of oil droplets from oil-in-water emulsion using metal ions encapsulated biopolymers: Role of metal ions and their mechanism in oil removal," *Int. J. Biol. Macromol.*, vol. 112, hal. 294–305, 2018.
- [24] S. Sabir, "Approach of cost-effective adsorbents for oil removal from oily water," *Crit. Rev. Environ. Sci. Technol.*, vol. 45, no. 17, hal. 1916–1945, 2015.
- [25] S. Songsaeng, P. Thamyongkit, dan S. Poompradub, "Natural rubber/reduced-graphene oxide composite materials: Morphological and oil adsorption properties for treatment of oil spills," *J. Adv. Res.*, vol. 20, hal. 79–89, 2019.
- [26] H. H. El-Maghrabi, R. Hosny, M. Ramzi, M. A. Zayed, dan M. Fathy, "Preparation and Characterization of Novel Magnetic ZnFe<sub>2</sub>O<sub>4</sub>-Hydroxyapatite Core-Shell Nanocomposite and Its Use as Fixed Bed Column System for Removal of Oil Residue in Oily Wastewater Samples," *Egypt. J. Pet.*, vol. 28, no. 2, hal. 137–144, 2019.
- [27] R. Zolfaghari, A. Fakhru'l-Razi, L. C. Abdullah, S. S. E. H. Elnashaie, dan A. Pendashteh, "Demulsification techniques of water-in-oil and oil-in-water emulsions in petroleum industry," *Sep. Purif. Technol.*, vol. 170, hal. 377–407, 2016.
- [28] A. A. Al-Shamrani, A. James, dan H. Xiao, "Separation of oil from water by dissolved air flotation," *Colloids Surfaces A Physicochem. Eng. Asp.*, vol. 209, no. 1, hal. 15–26, 2002.
- [29] A. Motta, C. Borges, K. Esquerre, dan A. Kiperstok, "Oil Produced Water treatment for oil removal by an integration of coalescer bed and microfiltration membrane processes," *J. Memb. Sci.*, vol. 469, hal. 371–378, 2014.
- [30] X. Li, C. Zhang, dan J. Liu, "Adsorption of oil from waste water by coal: Characteristics and mechanism," *Min. Sci. Technol.*, vol. 20, no. 5, hal. 778–781, 2010.
- [31] A. S. Santos, L. F. S. Oliveira, A. M. T. Marques, D. C. A. Silva, dan C. R. E. Mansur, "Evaluation of the efficiency of polyethylenimine as flocculants in the removal of oil present in produced water," *Colloids Surfaces A Physicochem. Eng. Asp.*, vol. 558, hal. 200–210, 2018.
- [32] S. Liu, X. Zhao, X. Dong, B. Miao, dan W. Du, "Treatment of produced water from polymer flooding process using a new type of air sparged hydrocyclone," *2005 SPE Asia Pacific Heal. Saf. Environ. Conf. Exhib. - Proc.*, vol. 2005, hal. 49–52, 2005.
- [33] S. Deng *et al.*, "Produced water from polymer flooding process in crude oil extraction: Characterization and treatment by a novel crossflow oil-water separator," *Sep. Purif. Technol.*, vol. 29, no. 3, hal. 207–216, 2002.
- [34] Y. S. Li, L. Yan, C. B. Xiang, dan L. J. Hong, "Treatment of oily wastewater by organic-inorganic composite tubular ultrafiltration (UF) membranes," *Desalination*, vol. 196, no. 1, hal. 76–83, 2006.
- [35] M. Cheryan dan N. Rajagopalan, "Membrane processing of oily streams. Wastewater treatment and waste reduction," *J. Memb. Sci.*, vol. 151, no. 1, hal. 13–28, 1998.

- [36] J. M. Lee dan T. Frankiewicz, "Treatment of produced water with an ultrafiltration (UF) membrane - A field trial," *Proc. - SPE Annu. Tech. Conf. Exhib.*, hal. 1363–1368, 2005.
- [37] I.-S. Chang, C.-M. Chung, dan S.-H. Han, "Treatment of oily wastewater by ultrafiltration and ozone," *Desalination*, vol. 133, no. 3, hal. 225–232, 2001.
- [38] F. Li, X. Wu, J. Wu, X. Xu, dan S. Ma, "Kinetic study of adsorption of oil from oilfield produced water using modified porous ceramics filtration media in column mode," *2nd Int. Conf. Bioinforma. Biomed. Eng. iCBBE 2008*, hal. 2745–2748, 2008.
- [39] A. Kayvani Fard, G. Mckay, Y. Manawi, Z. Malaibari, dan M. A. Hussien, "Outstanding adsorption performance of high aspect ratio and super-hydrophobic carbon nanotubes for oil removal," *Chemosphere*, vol. 164, hal. 142–155, 2016.
- [40] R. Bhawe, *Inorganic Membranes Synthesis, Characteristics and Applications: Synthesis, characteristics, and applications*. Springer Netherlands, 2012.
- [41] P. E. King, "Maureen produced water injection," *Offshore Eur.* 93, hal. 275–283, 1993.
- [42] K. Katika *et al.*, "Comparative analysis of experimental methods for quantification of small amounts of oil in water," *J. Pet. Sci. Eng.*, vol. 147, hal. 459–467, 2016.
- [43] D. Tian *et al.*, "Photo-induced water-oil separation based on switchable superhydrophobicity-superhydrophilicity and underwater superoleophobicity of the aligned ZnO nanorod array-coated mesh films," *J. Mater. Chem.*, vol. 22, no. 37, hal. 19652–19657, 2012.
- [44] M. N. Chollom, K. Pikwa, S. Rathilal, dan V. L. Pillay, "Fouling mitigation on a woven fibre microfiltration membrane for the treatment of raw water," *South African J. Chem. Eng.*, vol. 23, hal. 1–9, 2017.
- [45] M. Mouiya *et al.*, "Flat ceramic microfiltration membrane based on natural clay and Moroccan phosphate for desalination and industrial wastewater treatment," *Desalination*, vol. 427, no. November 2017, hal. 42–50, 2018.
- [46] S. E. Weschenfelder, M. J. C. Fonseca, B. R. S. Costa, dan C. P. Borges, "Influence of the use of surfactants in the treatment of produced water by ceramic membranes," *J. Water Process Eng.*, vol. 32, no. July, hal. 100955, 2019.
- [47] P. . Ramesh R. Bhawe, *INORGANIC MEMBRANES SYNTHESIS, CHARACTERISTICS AND APPLICATIONS*. 1991.
- [48] J. Zhong, X. Sun, dan C. Wang, "Treatment of oily wastewater produced from refinery processes using flocculation and ceramic membrane filtration," *Sep. Purif. Technol.*, vol. 32, no. 1, hal. 93–98, 2003.
- [49] W. Ma *et al.*, "Dual pH- and ammonia-vapor-responsive electrospun nanofibrous membranes for oil-water separations," *J. Memb. Sci.*, vol. 537, hal. 128–139, 2017.
- [50] G. da Costa Cunha, N. C. Pinho, I. A. Alves Silva, J. A. Santana Costa, C. M. P. da Silva, dan L. P. C. Romão, "Removal of heavy crude oil from water surfaces using a magnetic inorganic-organic hybrid

- powder and membrane system," *J. Environ. Manage.*, vol. 247, no. August 2018, hal. 9–18, 2019.
- [51] G. T. Vladislavljević, M. Shimizu, dan T. Nakashima, "Permeability of hydrophilic and hydrophobic Shirasu-porous-glass (SPG) membranes to pure liquids and its microstructure," *J. Memb. Sci.*, vol. 250, no. 1–2, hal. 69–77, 2005.
- [52] S. H. D. Silalahi dan T. Leiknes, "Cleaning strategies in ceramic microfiltration membranes fouled by oil and particulate matter in produced water," *Desalination*, vol. 236, no. 1, hal. 160–169, 2009.
- [53] G. T. Vladislavljević dan H. Schubert, "Influence of process parameters on droplet size distribution in SPG membrane emulsification and stability of prepared emulsion droplets," *J. Memb. Sci.*, vol. 225, no. 1–2, hal. 15–23, 2003.
- [54] D. H. Doyle dan A. B. Brown, "Produced water treatment and hydrocarbon removal with organoclay," *SPE Annu. Tech. Conf. Proc.*, no. PI, hal. 501–512, 2000.
- [55] M. A. Al-Kaabi, M. A. Al-Ghouti, M. Y. M. Ashfaq, T. Ahmed, dan N. Zouari, "An integrated approach for produced water treatment using microemulsions modified activated carbon," *J. Water Process Eng.*, vol. 31, no. April, hal. 100830, 2019.
- [56] X. Zhu, X. Wang, Y. Liu, Y. Tian, dan Y. Li, "Efficient adsorption of oil in water by hydrophobic nonwoven fabrics coated with cross-linked polydivinylbenzene fibers," *J. Chem. Technol. Biotechnol.*, vol. 94, no. 1, hal. 128–135, 2019.
- [57] H. Rezvani, Y. Kazemzadeh, M. Sharifi, M. Riazi, dan S. Shojaei, "A new insight into Fe<sub>3</sub>O<sub>4</sub>-based nanocomposites for adsorption of asphaltene at the oil/water interface: An experimental interfacial study," *J. Pet. Sci. Eng.*, vol. 177, hal. 786–797, 2019.
- [58] N. Cao, B. Yang, A. Barras, S. Szunerits, dan R. Boukherroub, "Polyurethane sponge functionalized with superhydrophobic nanodiamond particles for efficient oil/water separation," *Chem. Eng. J.*, vol. 307, hal. 319–325, 2017.
- [59] X. Wang, J. Yu, G. Sun, dan B. Ding, "Electrospun nanofibrous materials: a versatile medium for effective oil/water separation," *Mater. Today*, vol. 19, no. 7, hal. 403–414, 2016.
- [60] J. J. Li, Y. N. Zhou, dan Z. H. Luo, "Smart Fiber Membrane for pH-Induced Oil/Water Separation," *ACS Appl. Mater. Interfaces*, vol. 7, no. 35, hal. 19643–19650, 2015.
- [61] D. Tian *et al.*, "Photo-induced water–oil separation based on switchable superhydrophobicity–superhydrophilicity and underwater superoleophobicity of the aligned ZnO nanorod array-coated mesh films," *J. Mater. Chem.*, vol. 22, no. 37, hal. 19652–19657, 2012.
- [62] M. Fathy, M. El-Sayed, M. Ramzi, dan O. H. Abdelraheem, "Adsorption separation of condensate oil from produced water using ACTF prepared of oil palm leaves by batch and fixed bed techniques," *Egypt. J. Pet.*, vol. 27, no. 3, hal. 319–326, 2018.
- [63] E. Park dan S. M. Barnett, "Oil/water separation using nanofiltration membrane technology," *Sep. Sci. Technol.*, vol. 36, no. 7, hal. 1527–1542, 2001.
- [64] H. Unno, H. Saka, dan T. Akehata, "Oil separation from oil-water mixture by a porous poly

- (tetrafluoroethylene)(PTFE) membrane," *J. Chem. Eng. Japan*, vol. 19, no. 4, hal. 281–286, 1986.
- [65] Y. Suzuki dan T. Maruyama, "Removal of emulsified oil from water by coagulation and foam separation," *Sep. Sci. Technol.*, vol. 40, no. 16, hal. 3407–3418, 2005.
- [66] A. Almojjly, D. Johnson, D. L. Oatley-Radcliffe, dan N. Hilal, "Removal of oil from oil-water emulsion by hybrid coagulation/sand filter as pre-treatment," *J. Water Process Eng.*, vol. 26, no. July, hal. 17–27, 2018.
- [67] Heba H. El-Maghrabi, R. Hosny, M. Ramzi, M. A. Zayed, dan M. Fathy, "Preparation and Characterization of Novel Magnetic ZnFe<sub>2</sub>O<sub>4</sub>-Hydroxyapatite Core-Shell Nanocomposite and Its Use as Fixed Bed Column System for Removal of Oil Residue in Oily Wastewater Samples," *Egypt. J. Pet.*, vol. 28, no. 2, hal. 137–144, 2019.
- [68] E. Yazdani Sadati dan E. Sahraei, "An experimental investigation on enhancing water flooding performance using oil-in-water emulsions in an Iranian oil reservoir," *J. Pet. Explor. Prod. Technol.*, vol. 9, no. 4, hal. 2613–2624, 2019.
- [69] S. Xie *et al.*, "An electrochemical adsorption method for the reuse of waste water-based drilling fluids," *Nat. Gas Ind. B*, vol. 5, no. 5, hal. 508–512, 2018.
- [70] H. Roshan, S. Ehsani, C. E. Marjo, M. S. Andersen, dan R. I. Acworth, "Mechanisms of water adsorption into partially saturated fractured shales: An experimental study," *Fuel*, vol. 159, hal. 628–637, 2015.
- [71] A. Srinivasan dan T. Viraraghavan, "Removal of oil by walnut shell media," *Bioresour. Technol.*, vol. 99, no. 17, hal. 8217–8220, 2008.
- [72] B. K. Varghese dan T. G. Cleveland, "Kenaf as a deep-bed filter medium to remove oil from oil-in-water emulsions," 1998.
- [73] Z. Zhang, X. Du, K. H. Carlson, C. A. Robbins, dan T. Tong, "Effective treatment of shale oil and gas produced water by membrane distillation coupled with precipitative softening and walnut shell filtration," *Desalination*, vol. 454, no. December 2018, hal. 82–90, 2019.
- [74] Z. Z. Ismail, "Removal of Oil From Wastewater Using," *Al-Khwarizmi Eng. J.*, vol. 1, no. 1, hal. 117–124, 2005.
- [75] M. Sharma *et al.*, "Efficient oil removal from wastewater based on polymer coated superhydrophobic tetrapodal magnetic nanocomposite adsorbent," *Appl. Mater. Today*, vol. 17, hal. 130–141, 2019.
- [76] N. T. V. M. M. Dorfman, "FROM THE USINSK OIL FIELD BY IR-SPECTROSCOPIC," no. October, hal. 5–8, 1993.
- [77] E. Knapik dan J. Stopa, "Fibrous deep-bed filtration for oil/water separation using sunflower pith as filter media," *Ecol. Eng.*, vol. 121, hal. 44–52, 2018.
- [78] R. Kohlheb, "Water treatment technology for produced water," 2010.
- [79] Y. S. Li, L. Yan, C. B. Xiang, dan L. J. Hong, "Treatment of oily wastewater by organic-inorganic composite tubular ultrafiltration (UF) membranes," *Desalination*, vol. 196, no. 1–3, hal. 76–83, 2006.

- [80] M. Masuelli, J. Marchese, dan N. A. Ochoa, "SPC/PVDF membranes for emulsified oily wastewater treatment," *J. Memb. Sci.*, vol. 326, no. 2, hal. 688–693, 2009.
- [81] A. A. Al-Shamrani, A. James, dan H. Xiao, "Separation of oil from water by dissolved air flotation," *Colloids Surfaces A Physicochem. Eng. Asp.*, vol. 209, no. 1, hal. 15–26, 2002.
- [82] J. Zhong, X. Sun, dan C. Wang, "Treatment of oily wastewater produced from refinery processes using flocculation and ceramic membrane filtration," *Sep. Purif. Technol.*, vol. 32, no. 1–3, hal. 93–98, 2003.
- [83] M. Ebrahimi *et al.*, "Characterization and application of different ceramic membranes for the oil-field produced water treatment," *Desalination*, vol. 245, no. 1–3, hal. 533–540, 2009.
- [84] J. Hoslett *et al.*, "Surface water filtration using granular media and membranes: A review," *Sci. Total Environ.*, vol. 639, hal. 1268–1282, 2018.
- [85] M. Waszak dan M. Gryta, "The ultrafiltration ceramic membrane used for broth separation in membrane bioreactor," *Chem. Eng. J.*, vol. 305, hal. 129–135, 2016.
- [86] N. Cao, B. Yang, A. Barras, S. Szunerits, dan R. Boukherroub, "Polyurethane sponge functionalized with superhydrophobic nanodiamond particles for efficient oil/water separation," *Chem. Eng. J.*, vol. 307, hal. 319–325, 2017.
- [87] A. Kayvani Fard, G. McKay, Y. Manawi, Z. Malaibari, dan M. A. Hussien, "Outstanding adsorption performance of high aspect ratio and super-hydrophobic carbon nanotubes for oil removal," *Chemosphere*, vol. 164, hal. 142–155, 2016.
- [88] O. Alliod, L. Messenger, H. Fessi, D. Dupin, dan C. Charcosset, "Influence of viscosity for oil-in-water and water-in-oil nanoemulsions production by SPG premix membrane emulsification," *Chem. Eng. Res. Des.*, vol. 142, hal. 87–99, 2019.
- [89] C. Chen, G. Yan, S. Guo, dan Y. Yang, "Pretreatment of super viscous oil wastewater and its application in refinery," *Pet. Sci.*, vol. 5, no. 3, hal. 269–274, 2008.
- [90] S. Raghuvanshi, V. Bhakar, C. Sowmya, dan K. S. Sangwan, "Waste Water Treatment Plant Life Cycle Assessment: Treatment Process to Reuse of Water," *Procedia CIRP*, vol. 61, hal. 761–766, 2017.
